# Supplementary material for: Investigation into self-assembled collagen arrays guided by the surface properties of polyimide films
Source: Royal Society of Chemistry journal article supplement (doi:10.1039/d2sm01057g), 2022-01-01
Supplement: d2sm01057g1.pdf [file d2sm01057g1.pdf]

## **Electronic Supplementary Information**

### **Investigation into self-assembled collagen arrays guided by surface properties of polyimide films**

Yadong Chai <sup>a,b</sup>, Yanni Zhou <sup>a</sup>, Mari Miyata <sup>c</sup>, Motohiro Tagaya <sup>a,\*</sup>

<sup>a</sup> *Department of Materials Science and Technology, Nagaoka University of Technology,  
Kamitomioka 1603-1, Nagaoka, Niigata 940-2188, Japan.*

<sup>b</sup> *Research Fellow of the Japan Society for the Promotion of Science (DC),  
5-3-1 Koji-machi, Chiyoda-ku, Tokyo 102-0083, Japan.*

<sup>c</sup> *Department of Materials Engineering, National Institute of Technology, Nagaoka College,  
Nishikataikai 888, Nagaoka, Niigata 940-8532, Japan.*

---

**\* Author to whom correspondence should be addressed:**

Tel: +81-258-47-9345; Fax: +81-258-47-9300, E-mail: tagaya@mst.nagaokaut.ac.jp

**Figure S1**

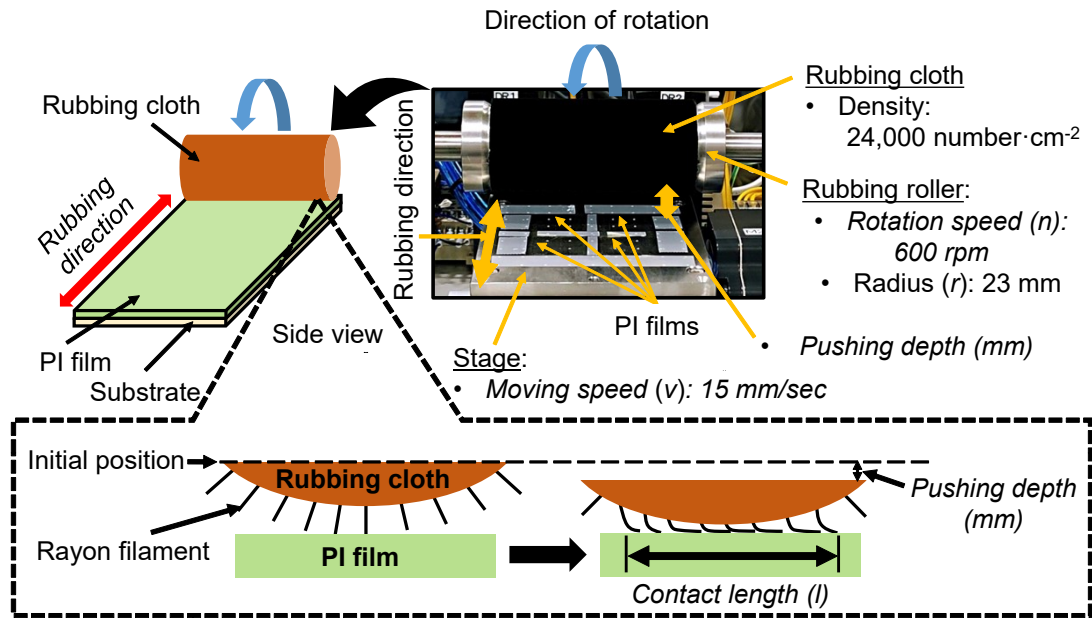

**Figure S1.** Illustration of the rubbing treatment equipment and the photograph.

**Figure S2**

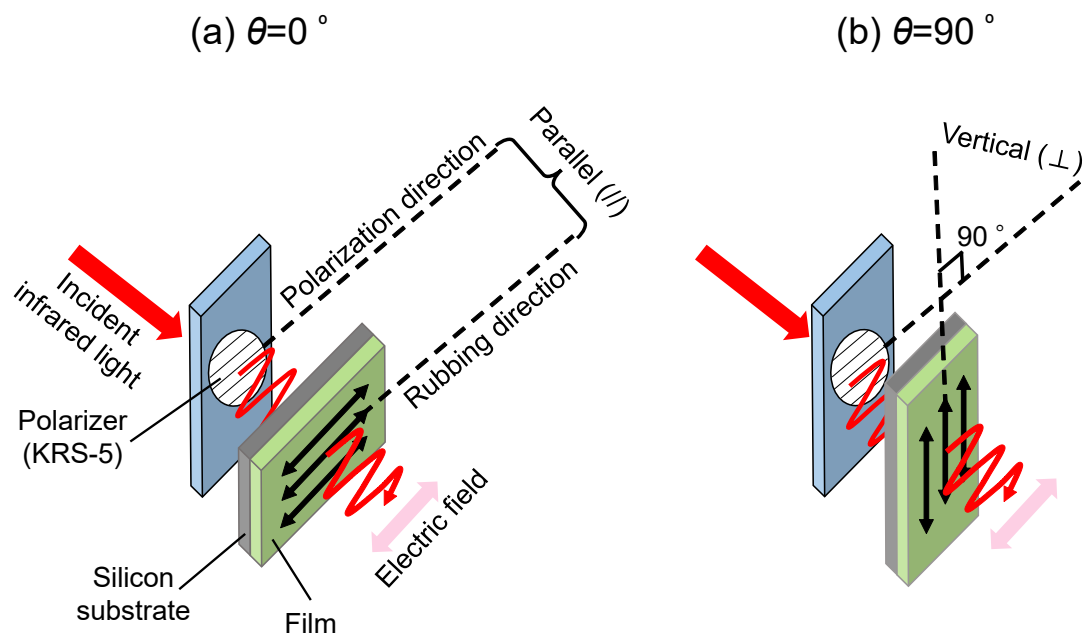

**Fig. S2.** Illustration of the polarized FT-IR measurement systems. (a) the state of “polarization direction // rubbing direction” was named as “ $\theta=0^\circ$ ”, and (b) the state of “polarization direction  $\perp$  rubbing direction” was named as “ $\theta=90^\circ$ ”. The  $\theta$  value was changed from  $0^\circ$  to  $90^\circ$ .

### **Equation (S1)**

The root mean square roughness ( $R_{rms}$  (nm)) was calculated by the following **Equation (S1)**.

$$R_{rms} = \sqrt{\frac{1}{n} \sum_{i=1}^n (h(x_i) - h)^2} \quad (\text{S1})$$

Here,  $n$  is the number of measurement points,  $h(x_i)$  is the height at the measurement point  $x_i$ , and  $h$  is the average height.

**Figure S3**

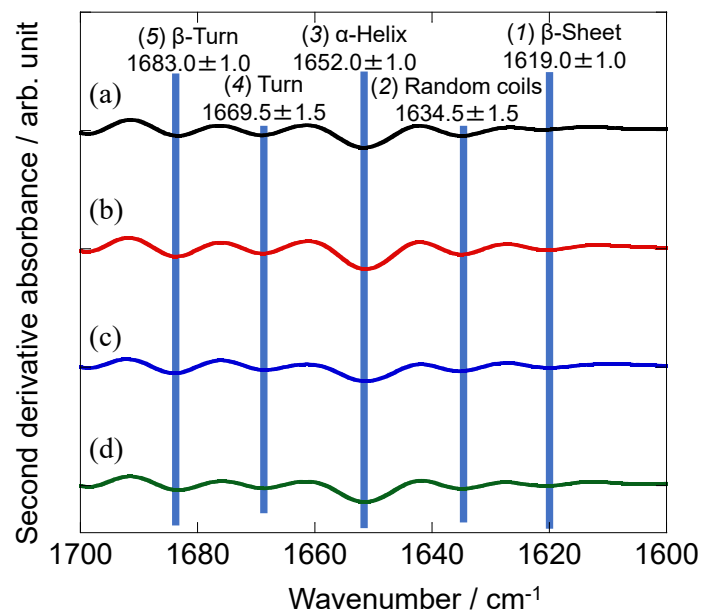

**Fig. S3.** The second derivative spectra of amide I bands of (a) PI-Col-M, (b) PI-R-Col-M, (c) PI-Col-F and (d) PI-R-Col-F, and the detailed assignments (1)–(5) were described in the experimental section.

**Figure S4**

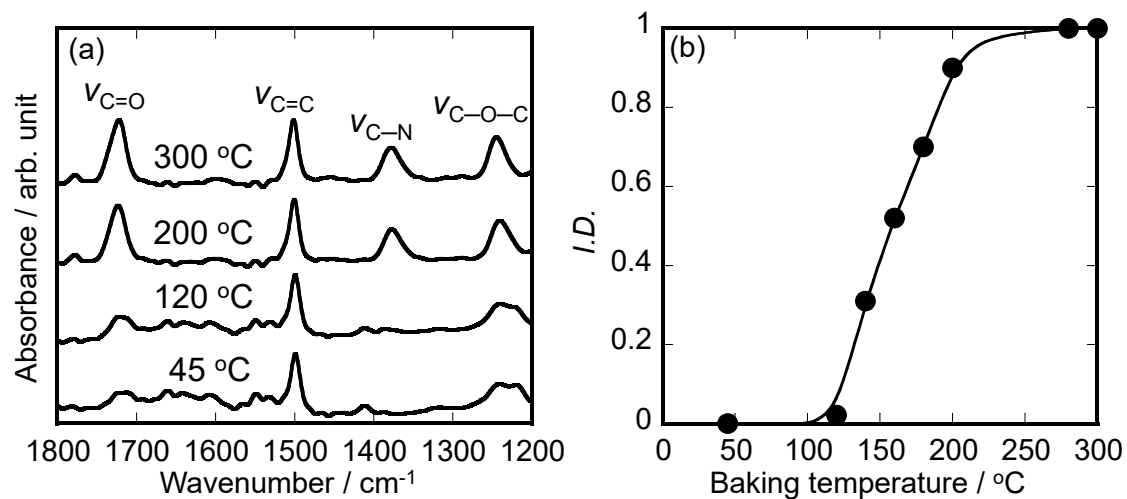

**Fig. S4.** (a) Representative FT-IR spectra of the PI films and (b) their *I. D.* values with the baking temperature in the range of 45~300 °C.

**Figure S5**

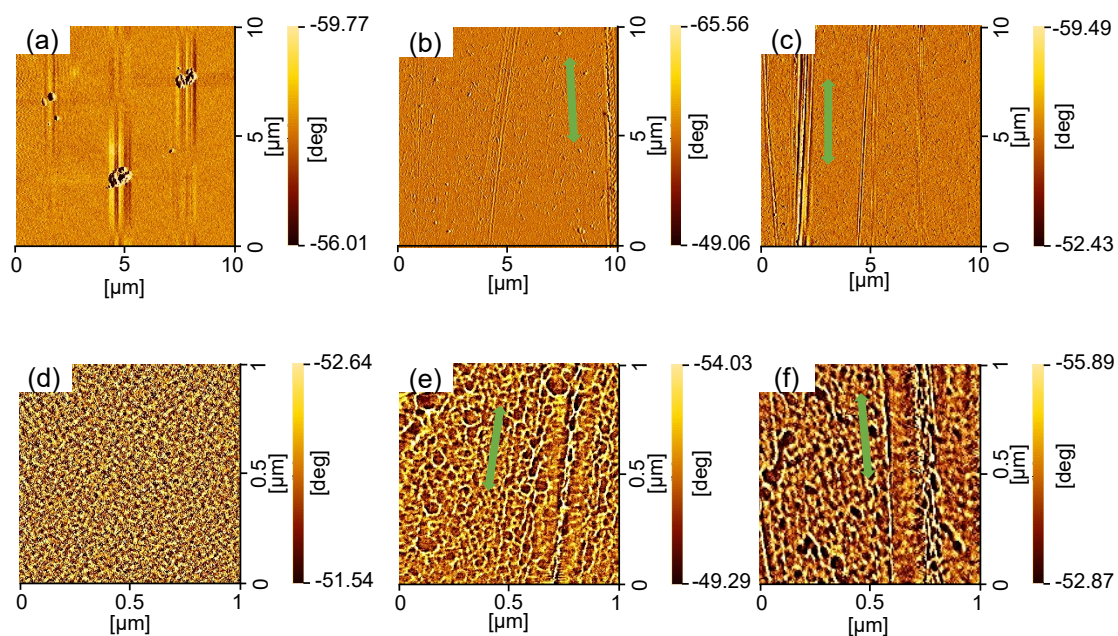

**Fig. S5.** Representative phase-shift images of the PI films treated with the *R.S.* values of (a, d) 0, (b, e) 2.4 and (c, f) 3.3 m at the observation area of (a~c)  $10\times 10 \mu\text{m}^2$  and (d~f)  $1\times 1 \mu\text{m}^2$ , which correspond to the topographic images in **Fig. 2**. The green arrows indicate the rubbing directions.

**Figure S6**

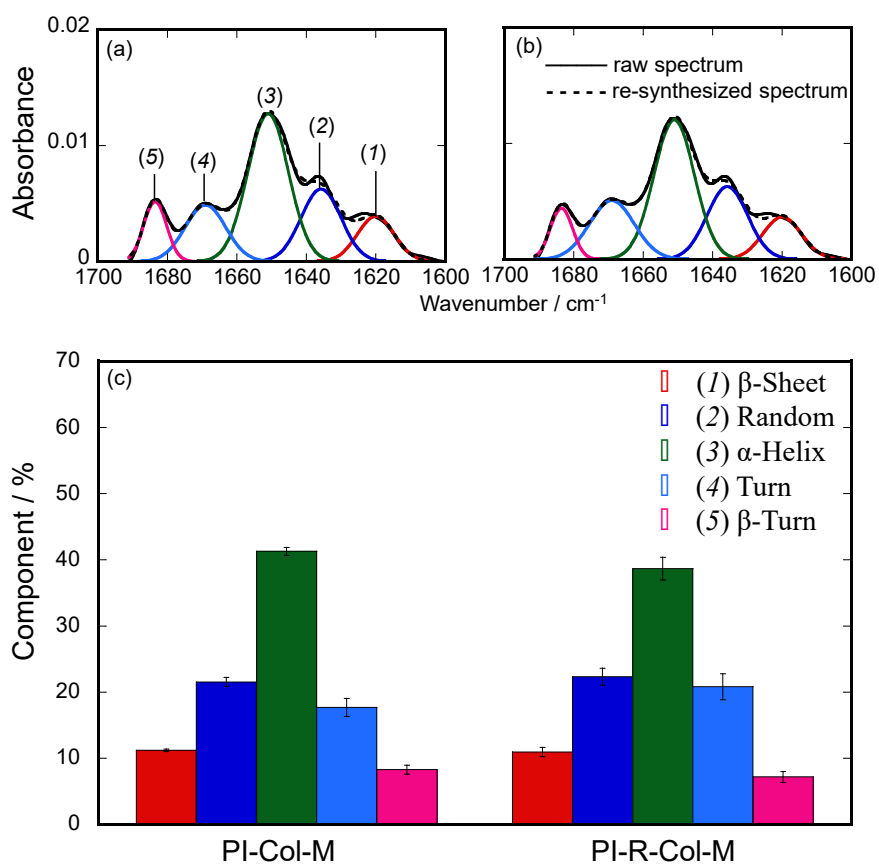

**Fig. S6.** FT-IR spectral deconvolution results of the amide I bands of Col molecules for (a) PI-Col-M and (b) PI-R-Col-M, where (c) the secondary structural components ratios of (1)  $\beta$ -Sheet, (2) Random, (3)  $\alpha$ -Helix, (4) Turn and (5)  $\beta$ -Turn were calculated ( $n=3$ , mean  $\pm$  SD).



**Figure S7**

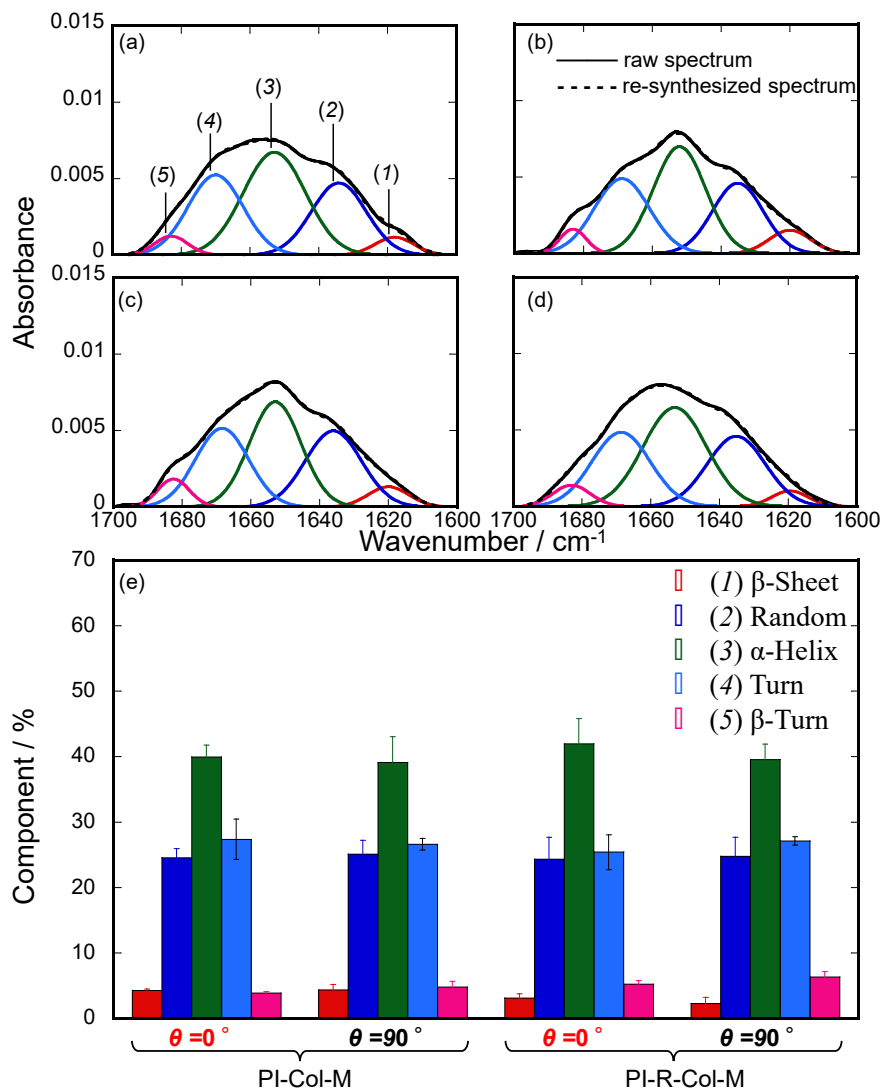

**Fig. S7.** Polarized FT-IR spectral deconvolution results of the amide I bands of Col molecules for (a, c) PI-Col-M and (b, d) PI-R-Col-M in the case of (a, b) “ $\theta = 0^\circ$ ” and (c, d) “ $\theta = 90^\circ$ ” where (e) the secondary structural component ratios of (1)  $\beta$ -Sheet, (2) Random, (3)  $\alpha$ -Helix, (4) Turn and (5)  $\beta$ -Turn were calculated ( $n=3$ , mean  $\pm$  SD). Here, the state of “polarization direction // rubbing direction” was named as “ $\theta = 0^\circ$ ” and that of “polarization direction  $\perp$  rubbing direction” was “ $\theta = 90^\circ$ ”.

**Figure S8**

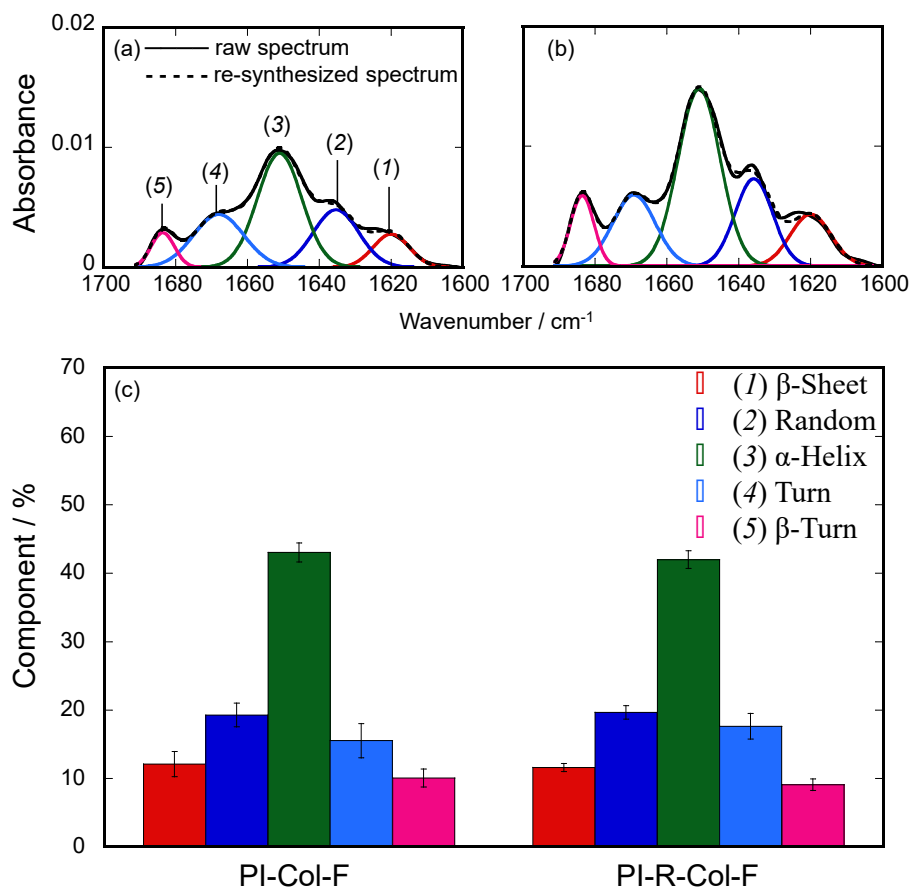

**Fig. S8.** FT-IR spectral deconvolution results of the amide I bands of Col fibrils for (a) PI-Col-F and (b) PI-R-Col-F, where (c) the secondary structural components ratios of (1)  $\beta$ -Sheet, (2) Random, (3)  $\alpha$ -Helix, (4) Turn and (5)  $\beta$ -Turn were calculated ( $n=3$ , mean  $\pm$  SD).

**Figure S9**

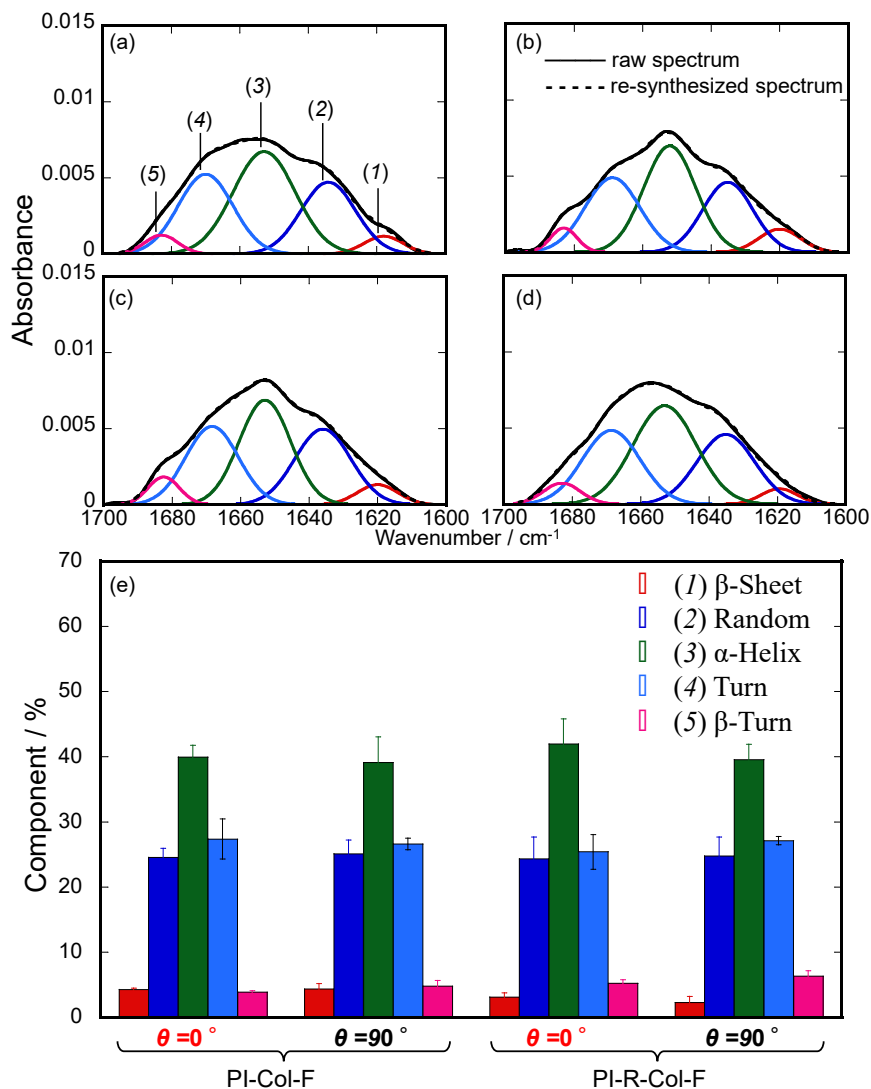

**Fig. S9.** Polarized FT-IR spectral deconvolution results of the amide I bands of Col fibrils for (a, c) PI-Col-F and (b, d) PI-R-Col-F in the case of (a, b) " $\theta = 0^\circ$ " and (c, d) " $\theta = 90^\circ$ ", where (e) the secondary structural component ratios of (1)  $\beta$ -Sheet, (2) Random, (3)  $\alpha$ -Helix, (4) Turn and (5)  $\beta$ -Turn were calculated ( $n=3$ , mean  $\pm$  SD). Here, the state of "polarization direction // rubbing direction" was named as " $\theta = 0^\circ$ " and that of "polarization direction  $\perp$  rubbing direction" was " $\theta = 90^\circ$ ".
